# Supplementary material for: New N-(3′-acetyl-8-nitro-2,3-dihydro-1H,3′H-spiro[quinoline-4,2′-[1,3,4]thiadiazol]-5′-yl) acetamides induced cell death in MCF-7 cells via G2/M phase cell cycle arrest
Source: Royal Society of Chemistry journal article supplement (doi:10.1039/d1nj02550c), 2021-12-30
Supplement: d1nj02550c1.pdf [file d1nj02550c1.pdf]

**New *N*-(3'-acetyl-8-nitro-2,3-dihydro-1*H*,3'*H*-spiro[quinoline-4,2'-[1,3,4]thiadiazol]-5'-yl) acetamides Induced Cell death in MCF-7 cells via G2/M Phase Cell Cycle Arrest**

Selvaraj Shyamsivappan<sup>a,b</sup>, Raju Vivek<sup>c</sup>, Thangaraj Suresh<sup>a</sup>, Palanivel Naveen<sup>b</sup>, Adhigaman Kaviyarasu<sup>a</sup>, Sundarasamy Amsaveni<sup>a</sup>, Shunmuganarayanan Athimoolam<sup>d</sup>, Palathurai Subramaniam Mohan<sup>a,\*</sup>

<sup>a</sup>*School of Chemical Sciences, Bharathiar University, Coimbatore-641046, Tamil Nadu, India.*

<sup>b</sup>*Department of Chemistry, Dr. N.G.P. Arts and Science College, Coimbatore-641048, Tamil Nadu, India.*

<sup>c</sup>*Cancer Research Program (CRP), Bio-Nano Therapeutics Research Laboratory, School of Life Sciences, Department of Zoology, Bharathiar University, Coimbatore-641046, Tamil Nadu, India.*

<sup>d</sup>*Department of Physics, Anna University, Nagercoil, Tamil Nadu, India*

**Crystal Data**

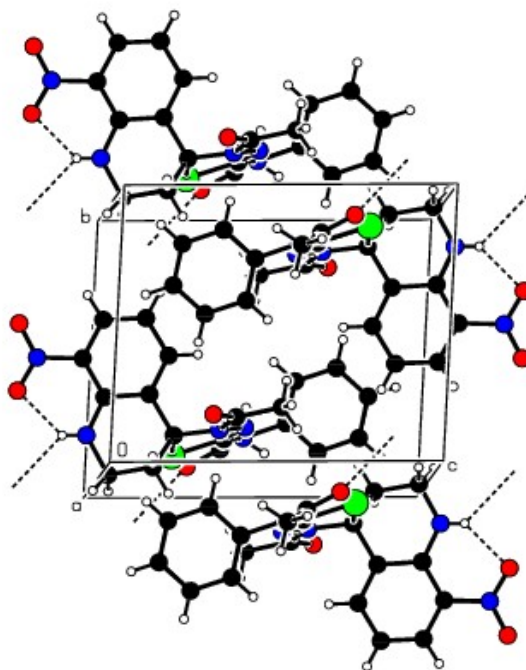

**Figure S1.** Packing of the molecules showed flat aggregation along *ab*-plane in the monoclinic unit cell is seen down along *a*-axis. The dashed lines are indicating the hydrogen bonds.

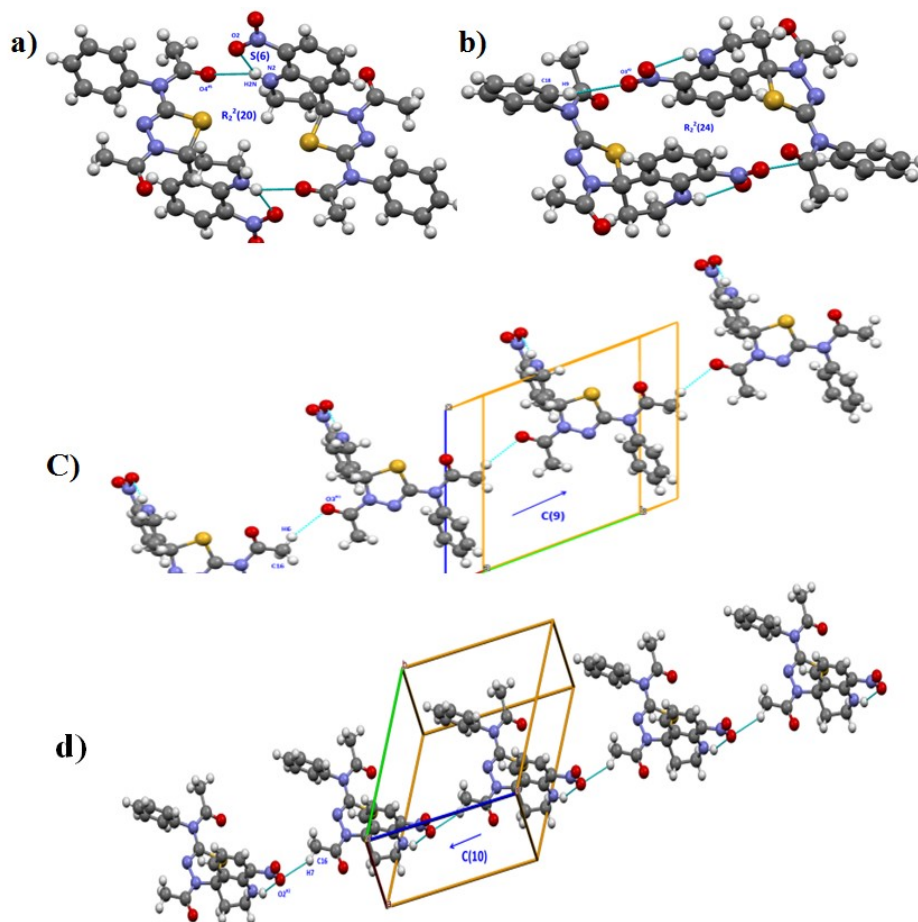

**Figure S2.** a & b shows the ring motifs; c & d shows the chain motifs. The dashed lines are indicating the hydrogen bonds.

**Table S1.** Geometry of hydrogen bonds ( $\text{\AA}$ ,  $^\circ$ )

| D-H $\cdots$ A                    | D(D-H)  | d(H $\cdots$ A) | D(D $\cdots$ A) | $\angle$ (DHA) |
|-----------------------------------|---------|-----------------|-----------------|----------------|
| C16-H6 $\cdots$ O3 <sup>#1</sup>  | 0.96    | 2.63            | 3.549(8)        | 161            |
| C16-H7 $\cdots$ O2 <sup>#2</sup>  | 0.96    | 2.56            | 3.166(8)        | 121            |
| C18-H9 $\cdots$ O3 <sup>#3</sup>  | 0.93    | 2.64            | 3.336(9)        | 133            |
| C20-H13 $\cdots$ O2 <sup>#4</sup> | 0.96    | 2.53            | 3.379(8)        | 148            |
| C21-H16 $\cdots$ O3               | 0.97    | 2.42            | 2.956(6)        | 115            |
| N2-H2N $\cdots$ O2                | 0.77(4) | 2.03(4)         | 2.625(7)        | 133(3)         |
| N2-H2N $\cdots$ O4 <sup>#5</sup>  | 0.77(4) | 2.58(4)         | 3.161(8)        | 134(3)         |

Symmetry transformation used to produce equivalent atoms:

#1  $x, y+1, z$ ; #2  $x, y+1, z-1$ ; #3  $-x+2, -y+1, -z+1$ ; #4  $x, y, z-1$ ; #5  $-x+2, -y+1, -z+2$ ;

**Table S2.** Crystallographic details of the compound **4a**, **4c**, and **4d**

|                                 | 4a                                                              | 4c                                                                                      | 4d                                                                                             |
|---------------------------------|-----------------------------------------------------------------|-----------------------------------------------------------------------------------------|------------------------------------------------------------------------------------------------|
| Empirical formula               | C <sub>14</sub> H <sub>15</sub> N <sub>5</sub> O <sub>4</sub> S | C <sub>16</sub> H <sub>19</sub> N <sub>5</sub> O <sub>4</sub> S                         | C <sub>20</sub> H <sub>19</sub> N <sub>5</sub> O <sub>4</sub> S                                |
| Formula weight                  | 349.37                                                          | 377.42                                                                                  | 425.46                                                                                         |
| Temperature                     | 293(2) K                                                        | 293 (2) K                                                                               | 293 (2) K                                                                                      |
| Wavelength                      | 0.71073 Å                                                       | 0.71073 Å                                                                               | 0.71073 Å                                                                                      |
| Crystal system                  | Tetragonal                                                      | Monoclinic                                                                              | Triclinic                                                                                      |
| Space group                     | I 41/a                                                          | C 2/c                                                                                   | P -1                                                                                           |
| Unit cell dimensions            | a = 18.03(3) Å<br>b = 18.028 Å<br>c = 20.39(4) Å                | a = 26.46(4) Å; α = 90°.<br>b = 6.552(10) Å; β = 94.62(2)°.<br>c = 20.28(3) Å; γ = 90°. | a = 8.80(2) Å α = 65.16(5)°.<br>b = 11.28(3) Å β = 87.05(7)°.<br>c = 11.33(3) Å γ = 84.17(7)°. |
| Volume                          | 6627(26) Å <sup>3</sup>                                         | 3504(9) Å <sup>3</sup>                                                                  | 1015(5) Å <sup>3</sup>                                                                         |
| Z                               | 16                                                              | 8                                                                                       | 2                                                                                              |
| Density (calculated)            | 1.401 Mg/m <sup>3</sup>                                         | 1.431 Mg/m <sup>3</sup>                                                                 | 1.392 Mg/m <sup>3</sup>                                                                        |
| Absorption coefficient          | 0.225 mm <sup>-1</sup>                                          | 0.218 mm <sup>-1</sup>                                                                  | 0.197 mm <sup>-1</sup>                                                                         |
| F(000)                          | 2912                                                            | 1584                                                                                    | 444                                                                                            |
| Theta range for data collection | 2.259 to 24.998°                                                | 2.439 to 25.000°                                                                        | 2.147 to 24.999°                                                                               |
| Index ranges                    | -21 ≤ h ≤ 20, -21 ≤ k ≤ 18, -24 ≤ l ≤ 24                        | -31 ≤ h ≤ 31, -7 ≤ k ≤ 7, -24 ≤ l ≤ 24                                                  | -10 ≤ h ≤ 10, -13 ≤ k ≤ 13, -13 ≤ l ≤ 13                                                       |
| Reflection collected            | 28469                                                           | 14309                                                                                   | 19566                                                                                          |
| Independent reflections         | 2922 [R(int) = 0.0503]                                          | 3080 [R(int) = 0.0550]                                                                  | 3591 [R(int) = 0.0811]                                                                         |
| Completeness to theta=25.242°   | 97.20 %                                                         | 97.00 %                                                                                 | 97.50 %                                                                                        |
| Refinement method               | Full-matrix least-squares on F <sup>2</sup>                     | Full-matrix least-squares on F <sup>2</sup>                                             | Full-matrix least-squares on F <sup>2</sup>                                                    |
| Data/ restraints/ parameters    | 2922/ 0/ 219                                                    | 3080/ 4/ 257                                                                            | 3591/ 0/ 277                                                                                   |
| Goodness of fit on F2           | 1.078                                                           | 1.035                                                                                   | 1.11                                                                                           |
| Final R indices [1.2sigma (I)]  | R1 = 0.0440, wR2 = 0.1151                                       | R1=0.0529, wR2 = 0.1307                                                                 | R1 = 0.0643, wR2 = 0.1540                                                                      |
| R indices (all data)            | R1= 0.0539, wR2= 0.1224                                         | R1= 0.0821, wR2= 0.1463                                                                 | R1= 0.0996, wR2= 0.1712                                                                        |
| Extinction coefficient          | n/a                                                             | n/a                                                                                     | n/a                                                                                            |
| Largest diff. peak and hole     | 0.409 and -0.368 e.Å <sup>-3</sup>                              | 0.337 and 0.611 e.Å <sup>-3</sup>                                                       | 0.796 and -0.302 e.Å <sup>-3</sup>                                                             |
| CCDC No.                        | 19800335                                                        | 1946891                                                                                 | 1980306                                                                                        |

**Table S3.** Crystallographic details of the compound **4f** and **4i**

|                   | 4f                                                              | 4i                                                                |
|-------------------|-----------------------------------------------------------------|-------------------------------------------------------------------|
| Empirical formula | C <sub>16</sub> H <sub>19</sub> N <sub>5</sub> O <sub>4</sub> S | C <sub>14</sub> H <sub>24</sub> ClN <sub>5</sub> O <sub>4</sub> S |
| Formula weight    | 377.42                                                          | 1531.21                                                           |
| Temperature       | 293(2) K                                                        | 292 (2) K                                                         |
| Wavelength        | 0.71073 Å                                                       | 0.71073 Å                                                         |

|                                 |                                                                 |                                                                                                    |
|---------------------------------|-----------------------------------------------------------------|----------------------------------------------------------------------------------------------------|
| Crystal system                  | Monoclinic                                                      | Triclinic                                                                                          |
| Space group                     | C2/c                                                            | P-1                                                                                                |
| Unit cell dimensions            | a = 26.56(4) Å<br>b = 7.133(12) Å = 95.72(2)°<br>c = 19.18(3) Å | a = 12.294(7) Å = 104.620(9)°<br>b = 16.369 (7) Å = 105.192(12)°<br>c = 18.699(10) Å = 100.914(9)° |
| Volume                          | 3615(10)Å <sup>3</sup>                                          | 3380(3)Å <sup>3</sup>                                                                              |
| Z                               | 8                                                               | 8                                                                                                  |
| Density (calculated)            | 1.387 Mg/m <sup>3</sup>                                         | 1.505 Mg/m <sup>3</sup>                                                                            |
| Absorption coefficient          | 0.212 mm <sup>-1</sup>                                          | 0.380 mm <sup>-1</sup>                                                                             |
| F(000)                          | 1584                                                            | 1576                                                                                               |
| Theta range for data collection | 2.505 to 24.997°.                                               | 2.171 to 25.000°.                                                                                  |
| Index ranges                    | -31 ≤ h ≤ 31, -8 ≤ k ≤ 8, -22 ≤ l ≤ 22                          | -14 ≤ h ≤ 14, -19 ≤ k ≤ 18, -22 ≤ l ≤ 22                                                           |
| Reflection collected            | 16162                                                           | 65269                                                                                              |
| Independent reflections         | 3190 [R(int) = 0.0823]                                          | 11902 [R(int) = 0.0644]                                                                            |
| Completeness to theta=25.242°   | 97.10%                                                          | 97.20%                                                                                             |
| Refinement method               | Full-matrix least-squares on F <sup>2</sup>                     | Full-matrix least-squares on F <sup>2</sup>                                                        |
| Data/ restraints/ parameters    | 3190 / 0 / 239                                                  | 11902 / 0 / 909                                                                                    |
| Goodness of fit on F2           | 1.042                                                           | 1.037                                                                                              |
| Final R indices [1.2sigma (I)]  | R1 = 0.0581, wR2 = 0.1298                                       | R1 = 0.0552, wR2 = 0.1387                                                                          |
| R indices (all data)            | R1 = 0.1023, wR2 = 0.1482                                       | R1 = 0.0831, wR2 = 0.1550                                                                          |
| Extinction coefficient          | n/a                                                             | n/a                                                                                                |
| Largest diff. peak and hole     | 0.334 and -0.254 e.Å <sup>-3</sup>                              | 1.112 and -0.402 e.Å <sup>-3</sup>                                                                 |
| CCDC No.                        | 1980370                                                         | 1980267                                                                                            |

**Table S4.** Crystallographic details of the compound **4h** and **4k**

|                                 | <b>4h</b>                                                                | <b>4k</b>                                                                |
|---------------------------------|--------------------------------------------------------------------------|--------------------------------------------------------------------------|
| Empirical formula               | C <sub>21</sub> H <sub>21</sub> N <sub>5</sub> O <sub>4</sub> S          | C <sub>16</sub> H <sub>18</sub> ClN <sub>5</sub> O <sub>4</sub> S        |
| Formula weight                  | 439.49                                                                   | 410.85                                                                   |
| Temperature                     | 293(2) K                                                                 | 293(2) K                                                                 |
| Wavelength                      | 0.71073 Å                                                                | 0.71073 Å                                                                |
| Crystal system                  | Monoclinic                                                               | Monoclinic                                                               |
| Space group                     | P 21/n                                                                   | C 2/c                                                                    |
| Unit cell dimensions            | a = 9.726(17) Å<br>b = 11.07(2) Å; $\beta$ = 99.75(3)°<br>c = 20.74(3) Å | a = 26.56(3) Å<br>b = 6.708(6) Å $\beta$ = 93.285(17)°<br>c = 20.85(2) Å |
| Volume                          | 2200(7) Å <sup>3</sup>                                                   | 3709(6) Å <sup>3</sup>                                                   |
| Z                               | 4                                                                        | 8                                                                        |
| Density (calculated)            | 1.327 Mg/m <sup>3</sup>                                                  | 1.472 Mg/m <sup>3</sup>                                                  |
| Absorption coefficient          | 0.184 mm <sup>-1</sup>                                                   | 0.352 mm <sup>-1</sup>                                                   |
| F(000)                          | 920                                                                      | 1704                                                                     |
| Theta range for data collection | 2.092 to 24.999°.                                                        | 2.418 to 25.000°.                                                        |

|                                |                                                   |                                                   |
|--------------------------------|---------------------------------------------------|---------------------------------------------------|
| Index ranges                   | -10 ≤ h ≤ 11, -13 ≤ k ≤ 13, -24 ≤ l ≤ 24          | -31 ≤ h ≤ 31, -7 ≤ k ≤ 7, -24 ≤ l ≤ 21            |
| Reflection collected           | 16122                                             | 12115                                             |
| Independent reflections        | 3880 [R(int) = 0.0357]                            | 3255 [R(int) = 0.0412]                            |
| Completeness to theta=25.242°  | 97.40%                                            | 97.10%                                            |
| Refinement method              | Full-matrix least-squares on F2                   | Full-matrix least-squares on F2                   |
| Data/ restraints/ parameters   | 3880 / 0 / 283                                    | 3255 / 0 / 250                                    |
| Goodness of fit on F2          | 1.067                                             | 1.055                                             |
| Final R indices [I.2sigma (I)] | R <sub>1</sub> = 0.0436, wR <sub>2</sub> = 0.1073 | R <sub>1</sub> = 0.0578, wR <sub>2</sub> = 0.1422 |
| R indices (all data)           | R <sub>1</sub> = 0.0559, wR <sub>2</sub> = 0.1136 | R <sub>1</sub> = 0.0791, wR <sub>2</sub> = 0.1553 |
| Extinction coefficient         | n/a                                               | n/a                                               |
| Largest diff. peak and hole    | 0.254 and -0.175 e.Å <sup>-3</sup>                | 0.588 and -0.471 e.Å <sup>-3</sup>                |
| CCDC No.                       | 1980270                                           | 1980268                                           |

### UV-Visible and Fluorescence Studies

The absorption spectrum of the compound **4a** showed intense bands at 282 and 436 nm in DMSO solvent. Further, the fluorescence spectrum of the compounds **4a** was recorded and the emission wavelength observed at 560 nm (Figure S3).

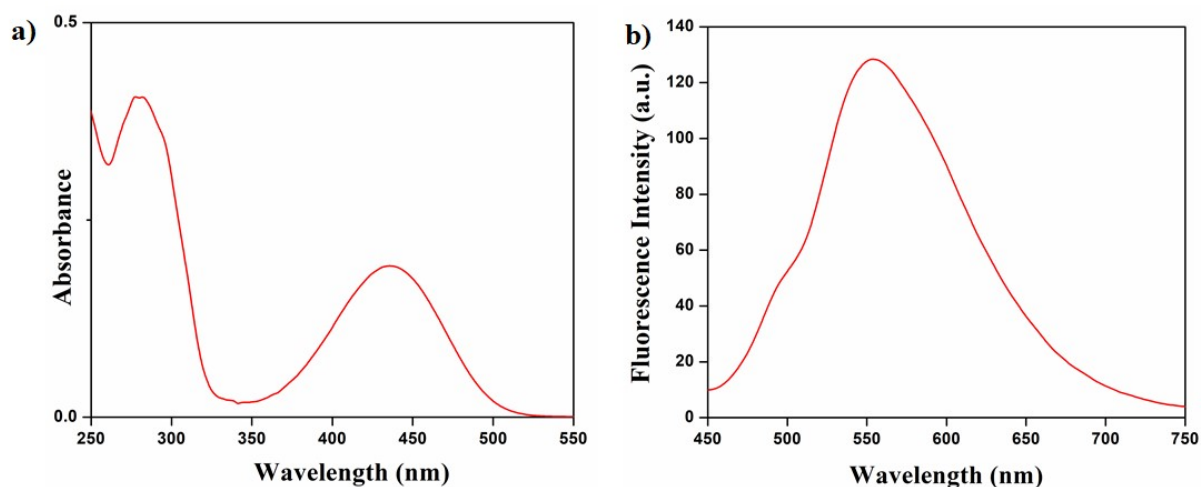

**Figure S3.** a) Absorption spectrum of the compound **4a** ( $2 \times 10^{-4}$  M,  $\lambda_{\text{ex}} = 282$  and 436 nm) in DMSO. b) Fluorescence spectrum of the compounds **4a** ( $2 \times 10^{-4}$  M,  $\lambda_{\text{ex}} = 560$  nm) in DMSO.

### Spectral Data

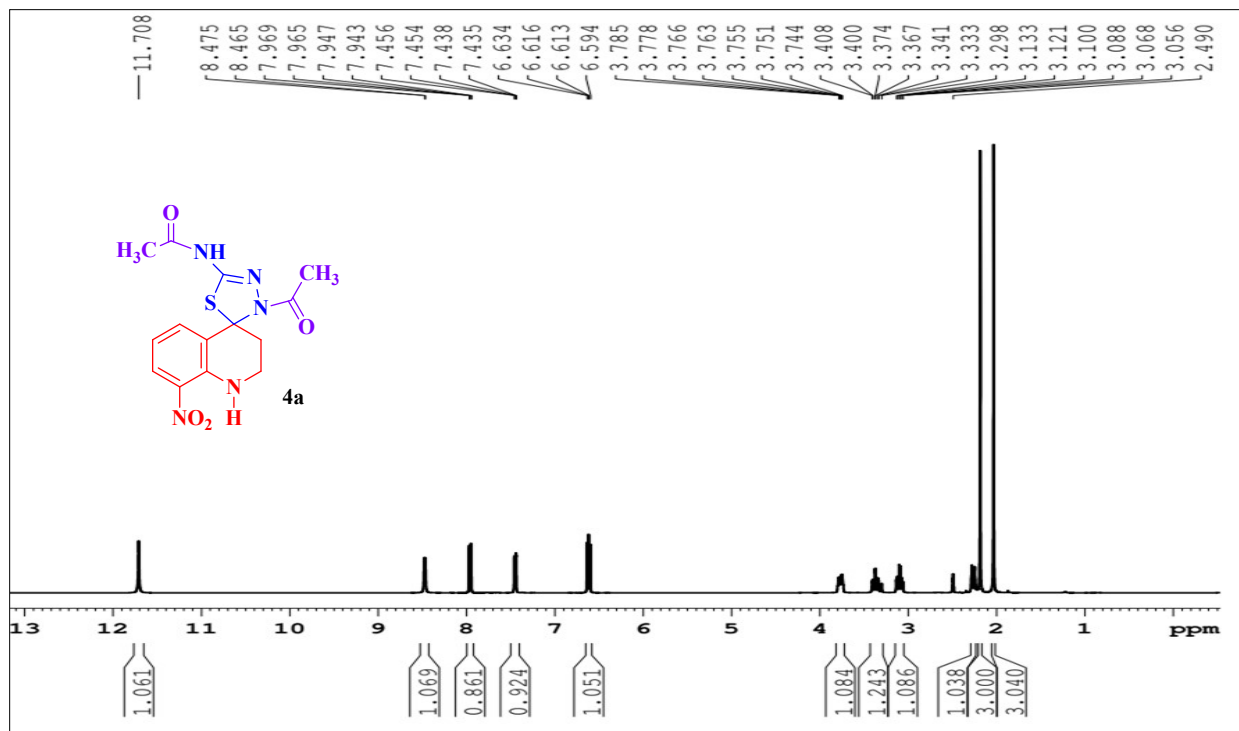

Figure S4. <sup>1</sup>H NMR spectrum of compound 4a

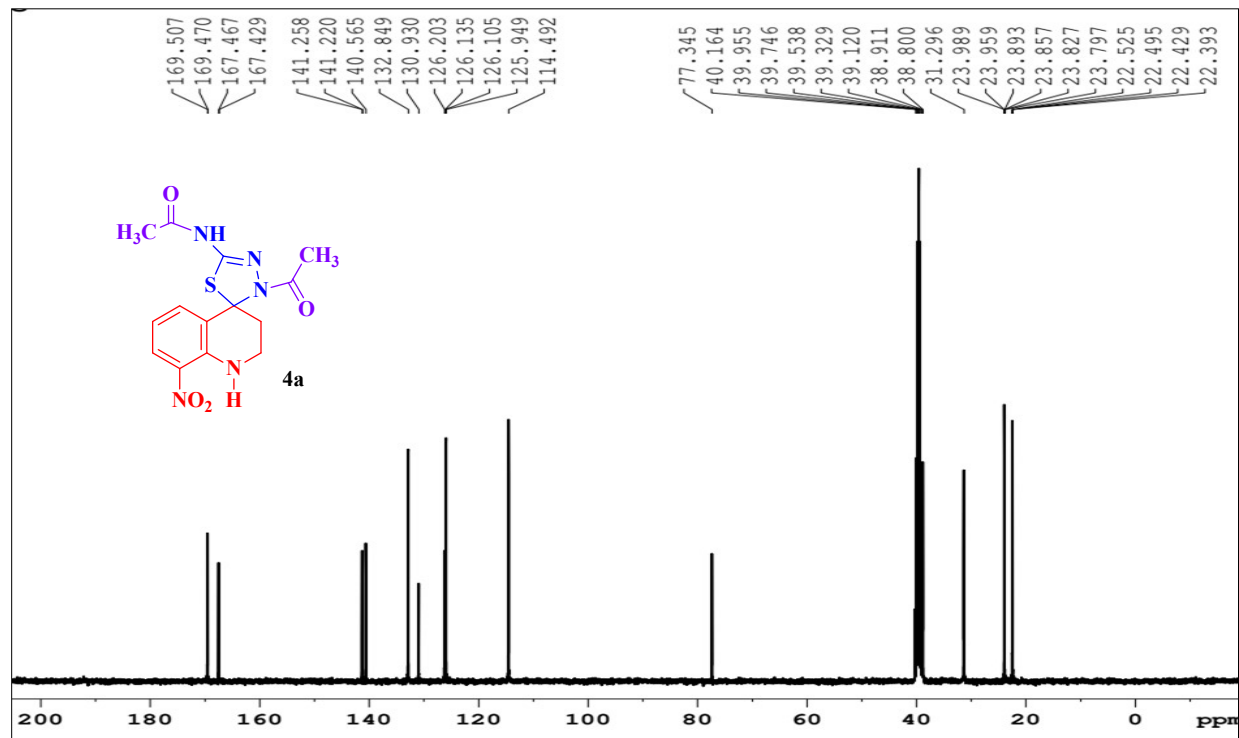

Figure S5. <sup>13</sup>C spectrum of compound 4a

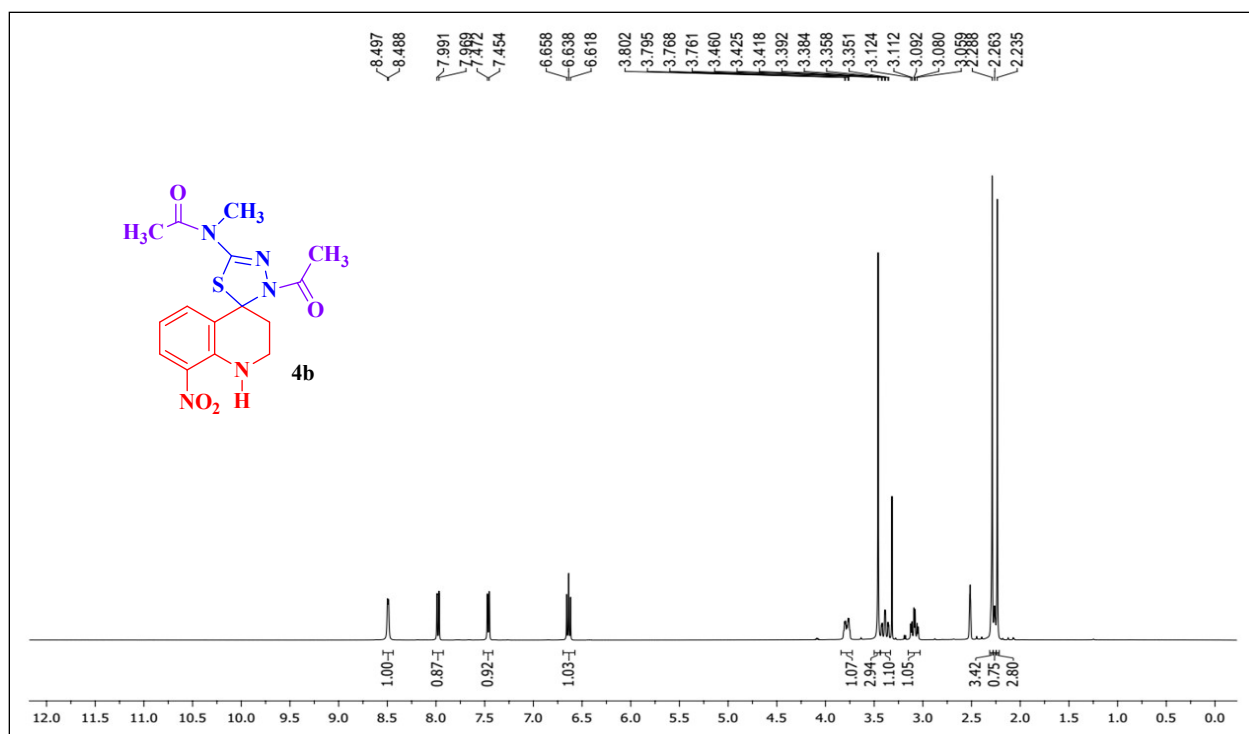

Figure S6.  $^1\text{H}$  NMR spectrum of compound 4b

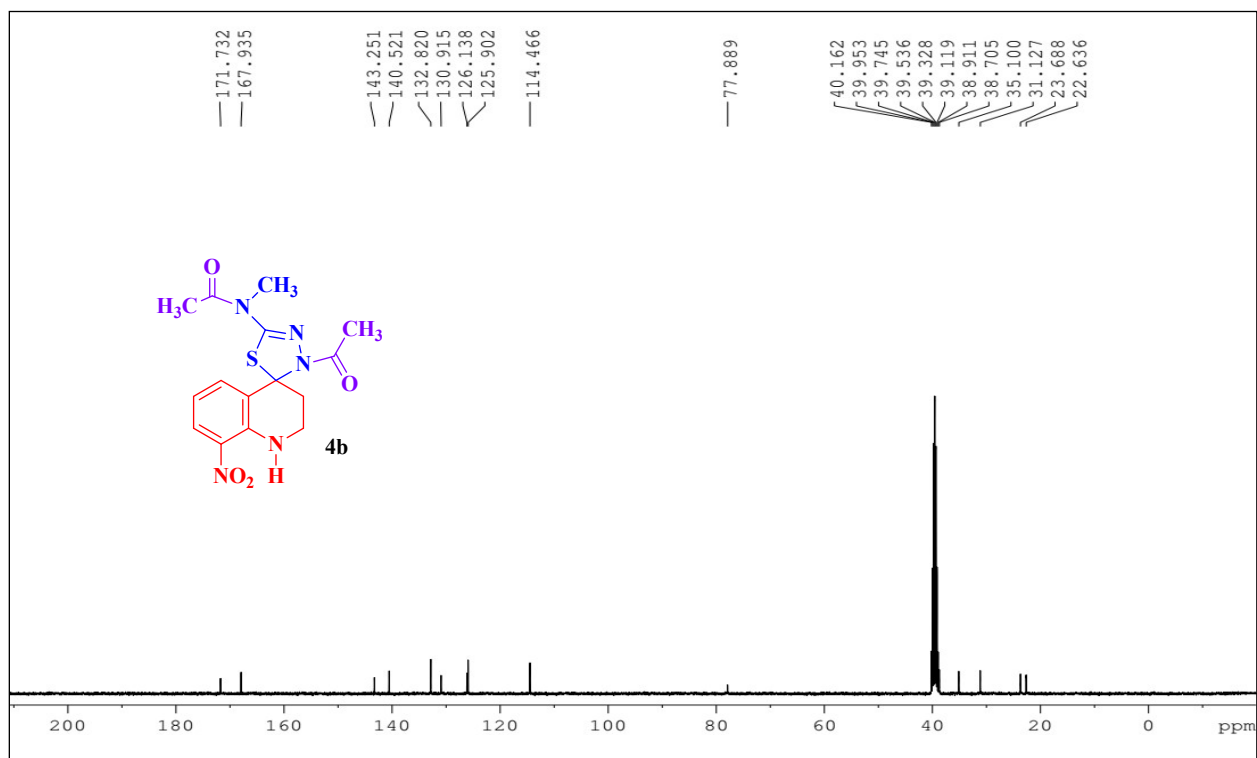

Figure S7.  $^{13}\text{C}$  spectrum of compound 4b

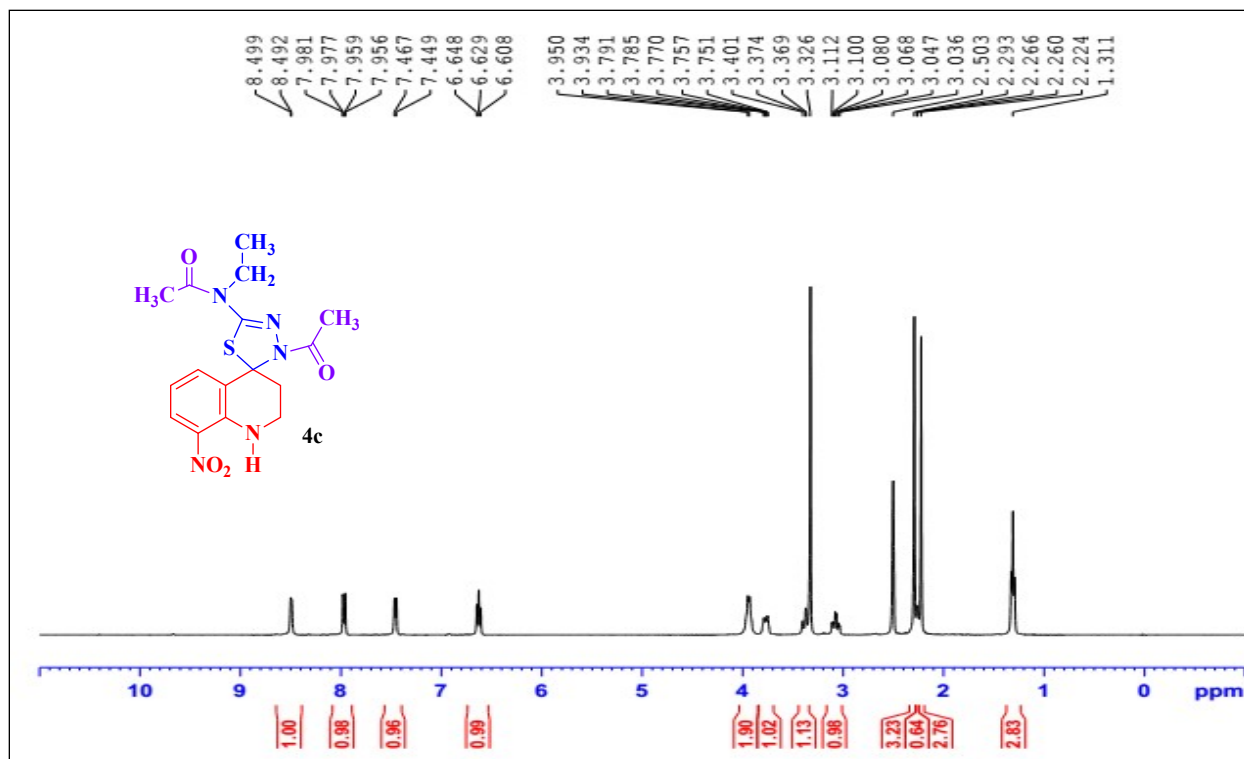

Figure S8. <sup>1</sup>H NMR spectrum of compound 4c

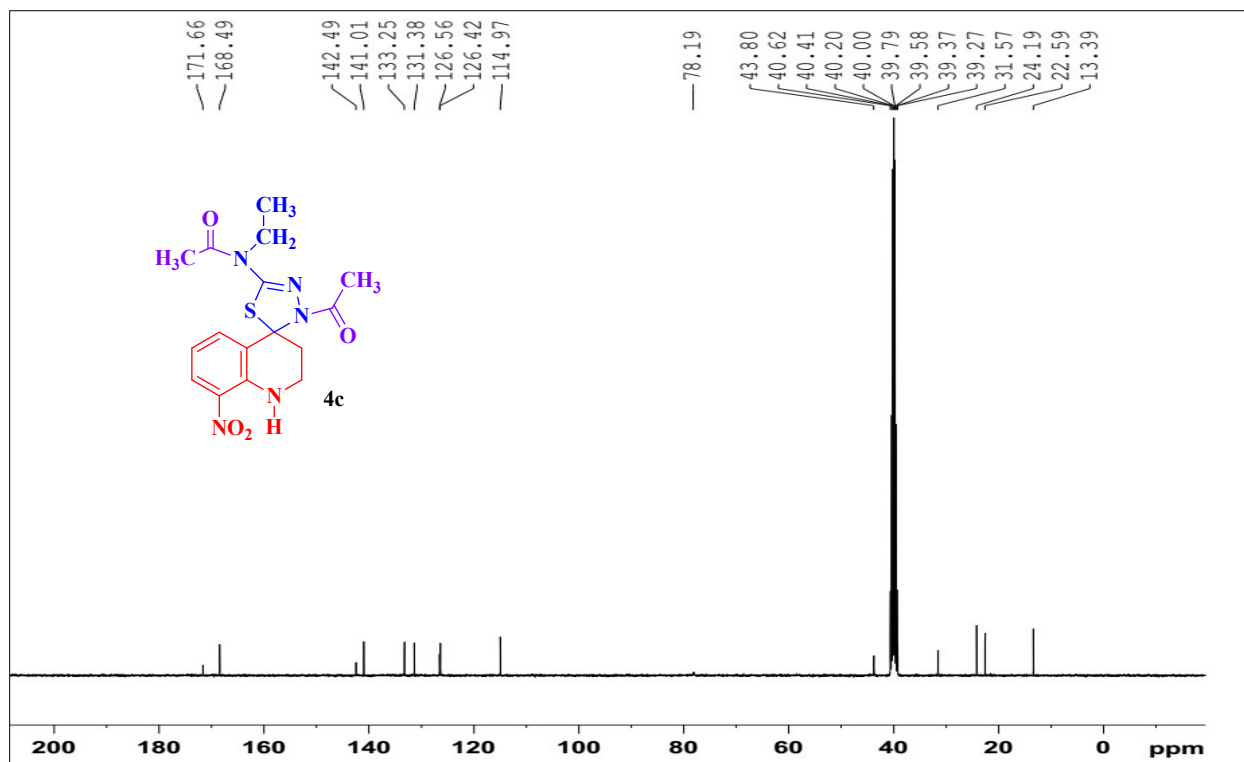

Figure S9. <sup>13</sup>C NMR spectrum of compound 4c



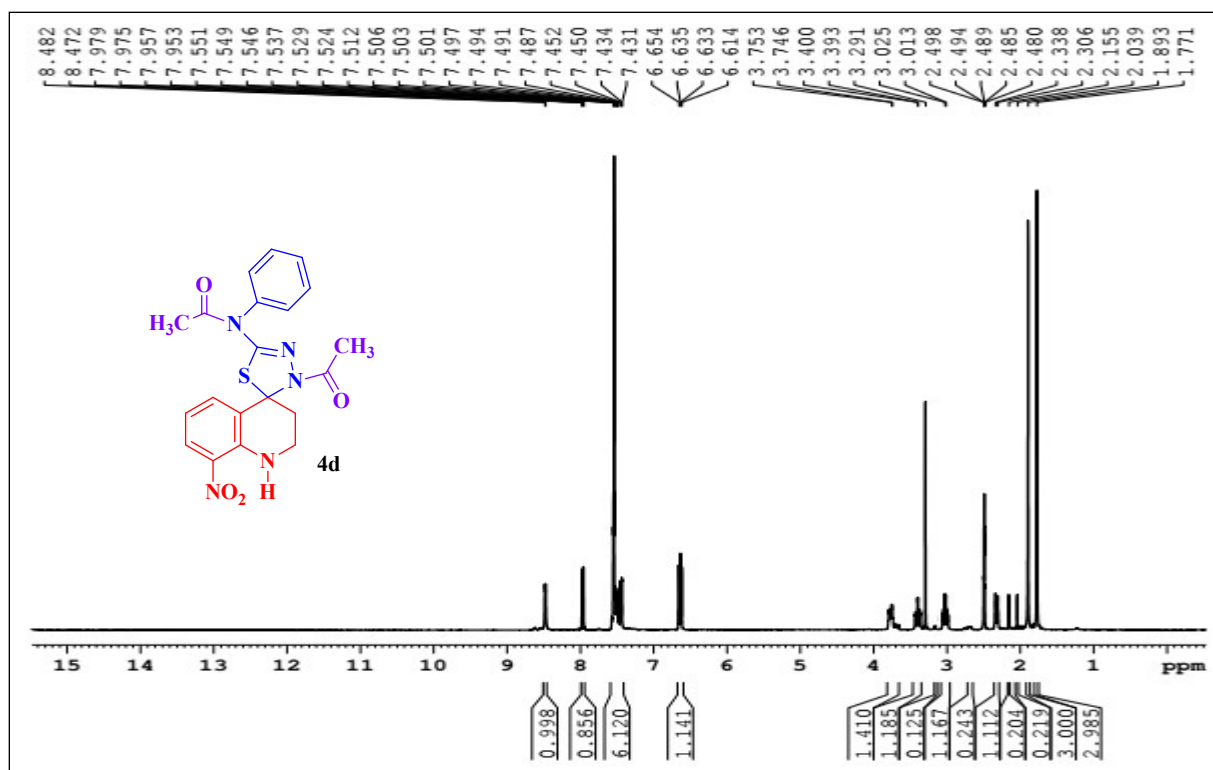

Figure S10. <sup>1</sup>H NMR spectrum of compound 4d

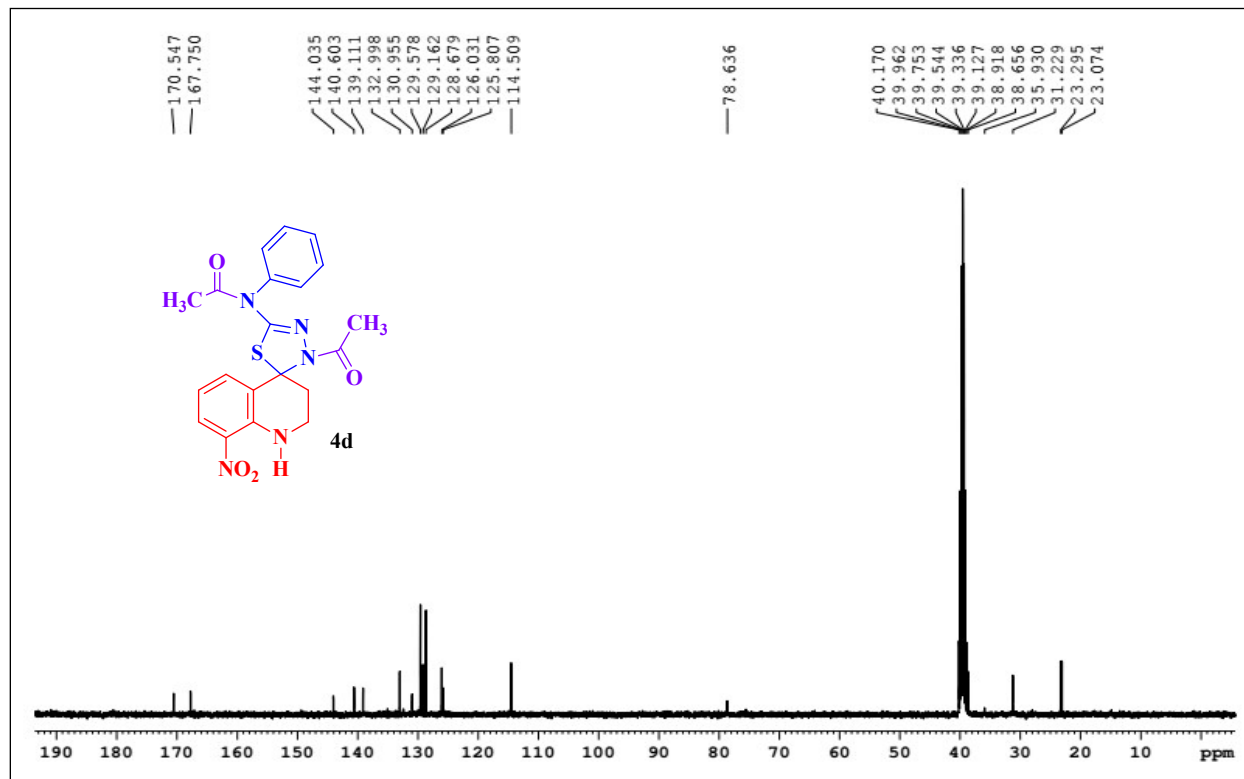

Figure S11. <sup>13</sup>C NMR spectrum of compound 4d

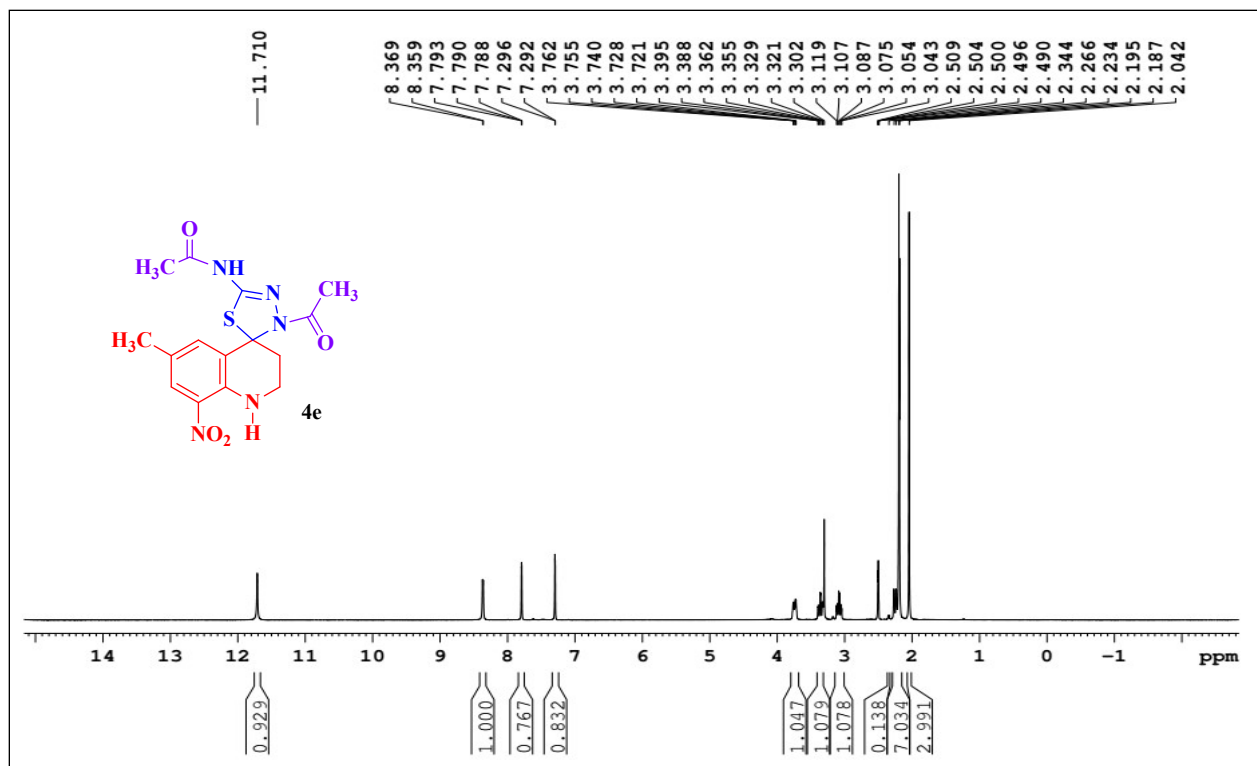

Figure S12. <sup>1</sup>H NMR spectrum of compound 4e

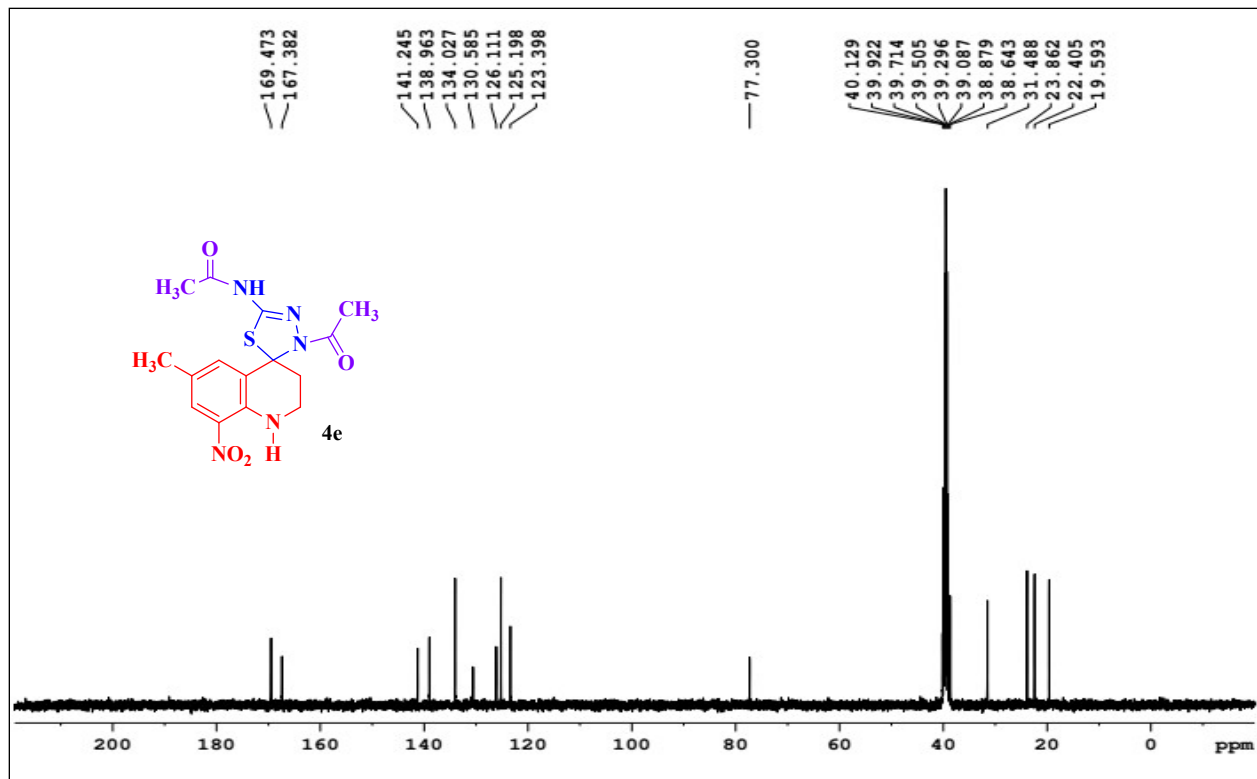

Figure S13. <sup>13</sup>C NMR spectrum of compound 4e

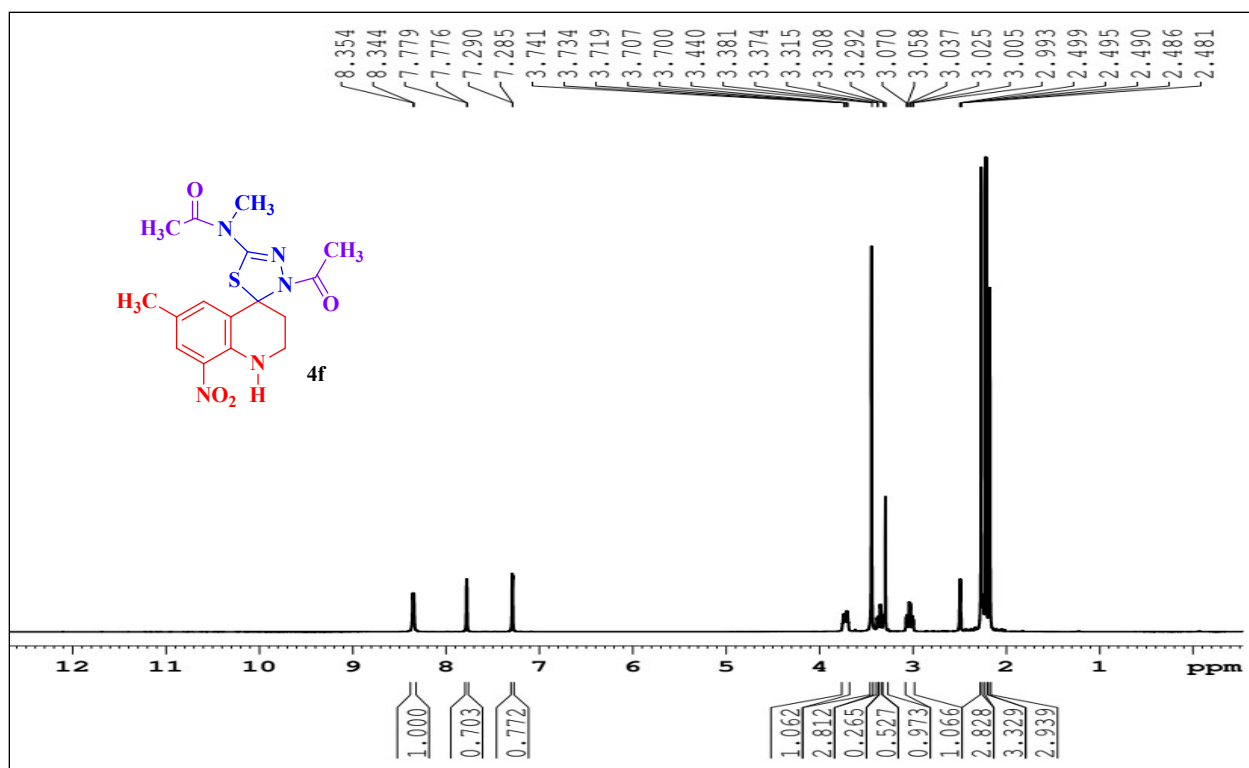

Figure S14. <sup>1</sup>H NMR spectrum of compound 4f

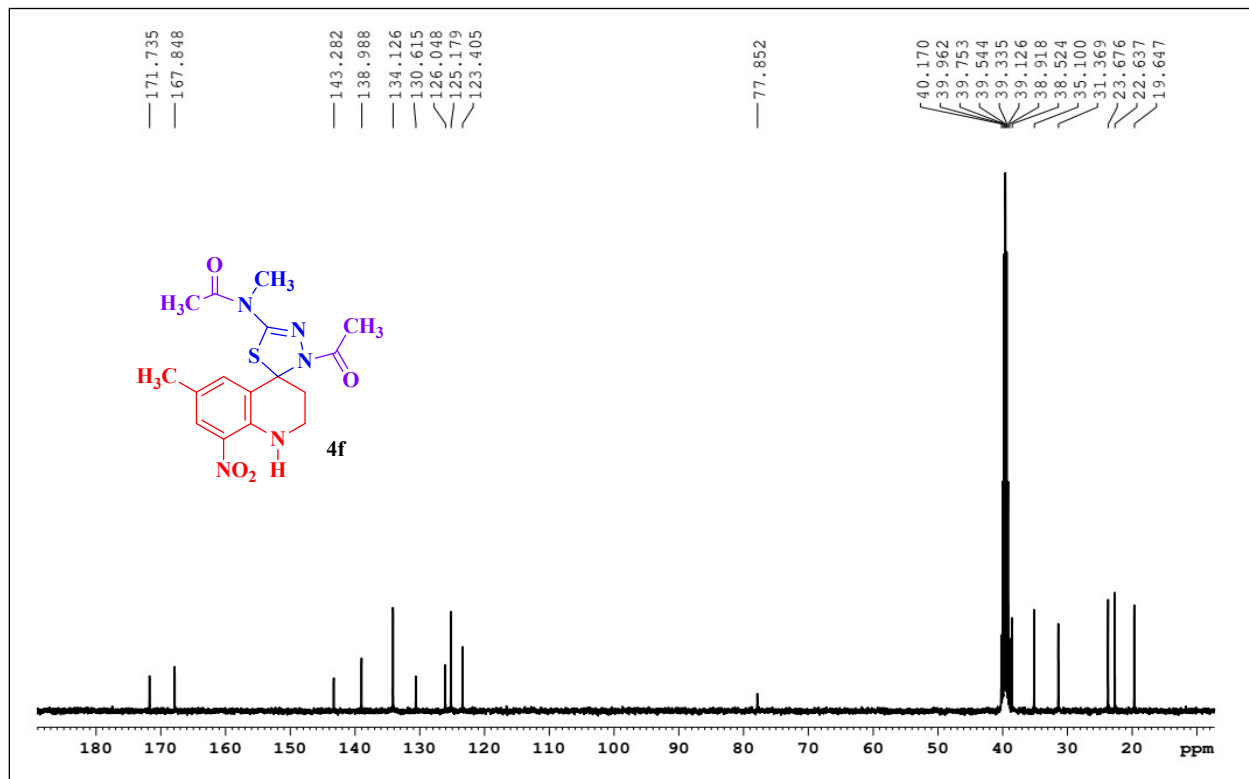

Figure S15. <sup>13</sup>C NMR spectrum of compound 4f

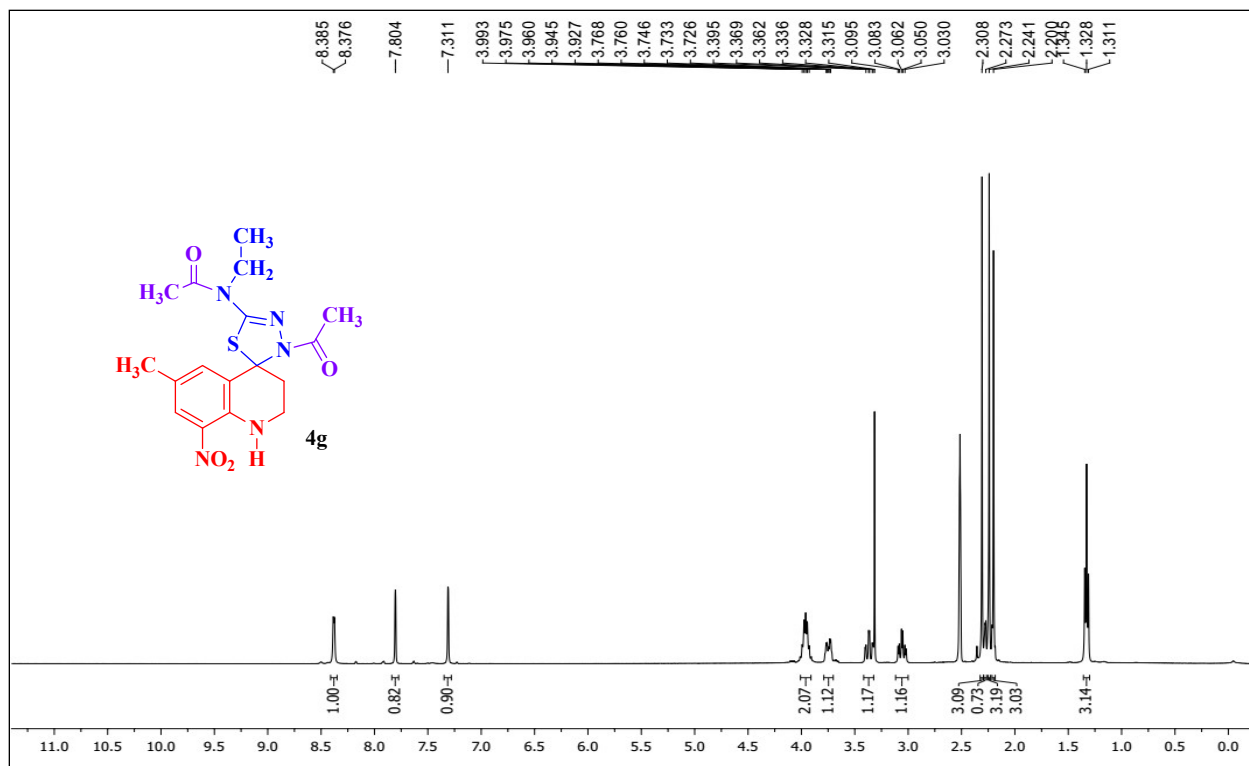

Figure S16. <sup>1</sup>H NMR spectrum of compound 4g

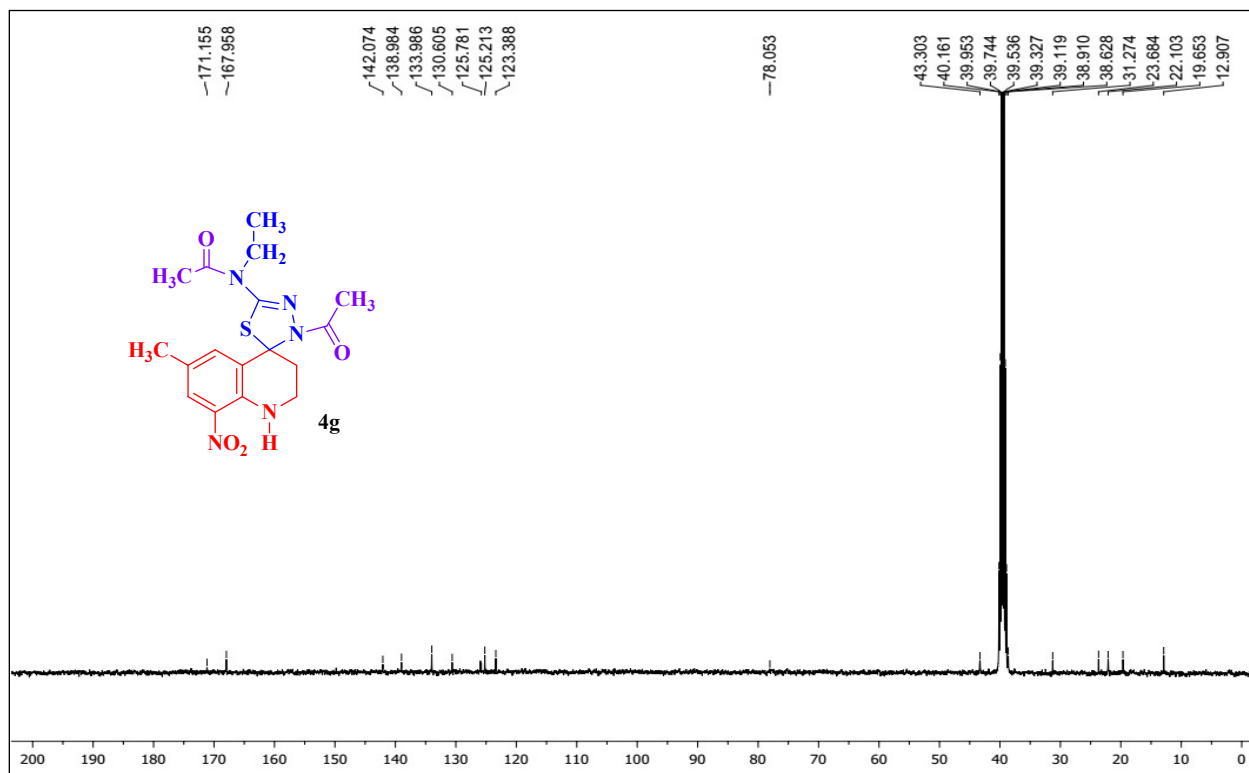

Figure S17. <sup>13</sup>C NMR spectrum of compound 4g

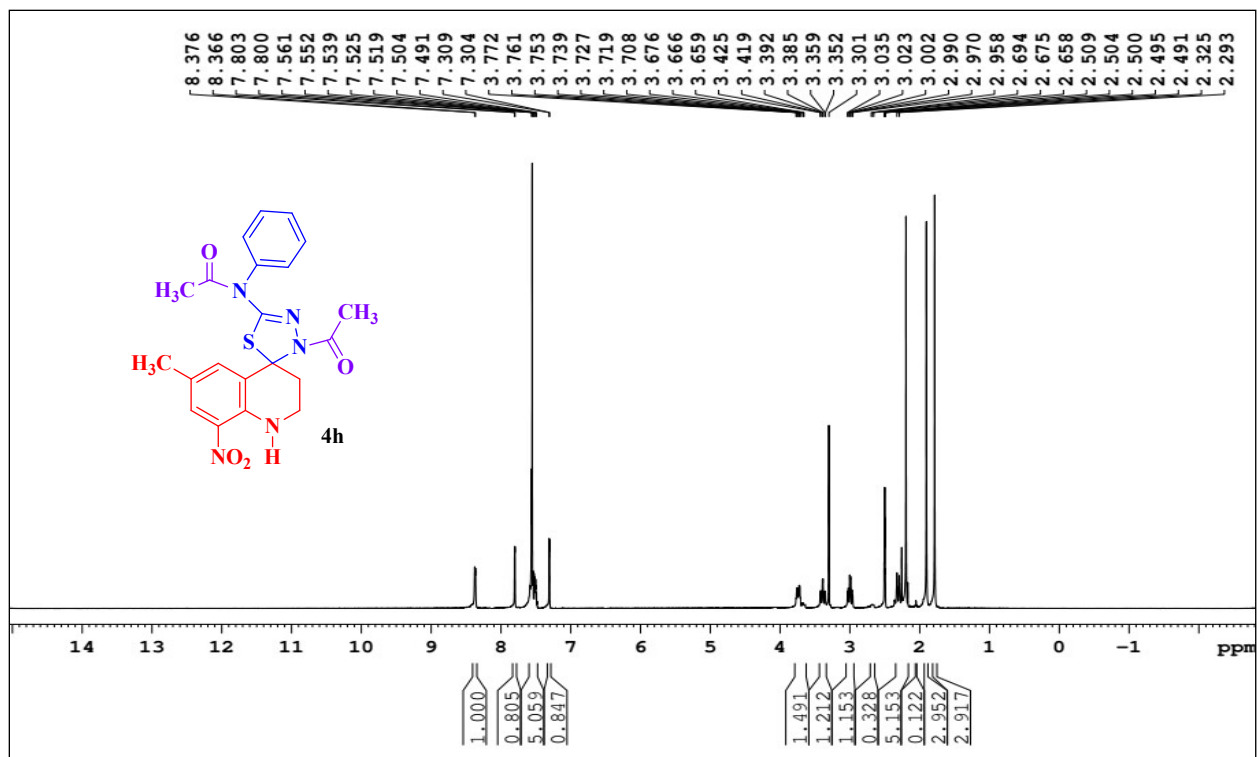

Figure S18. <sup>1</sup>H NMR spectrum of compound 4h

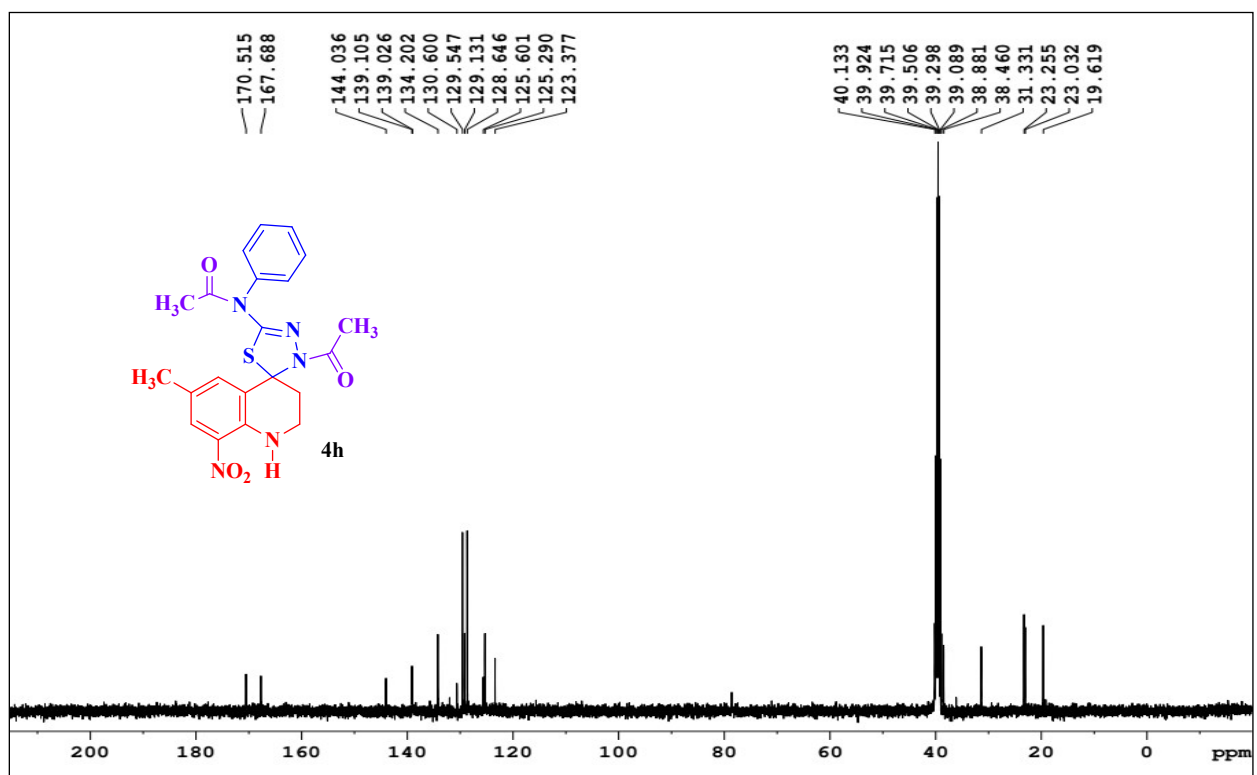

Figure S19. <sup>13</sup>C NMR spectrum of compound 4h

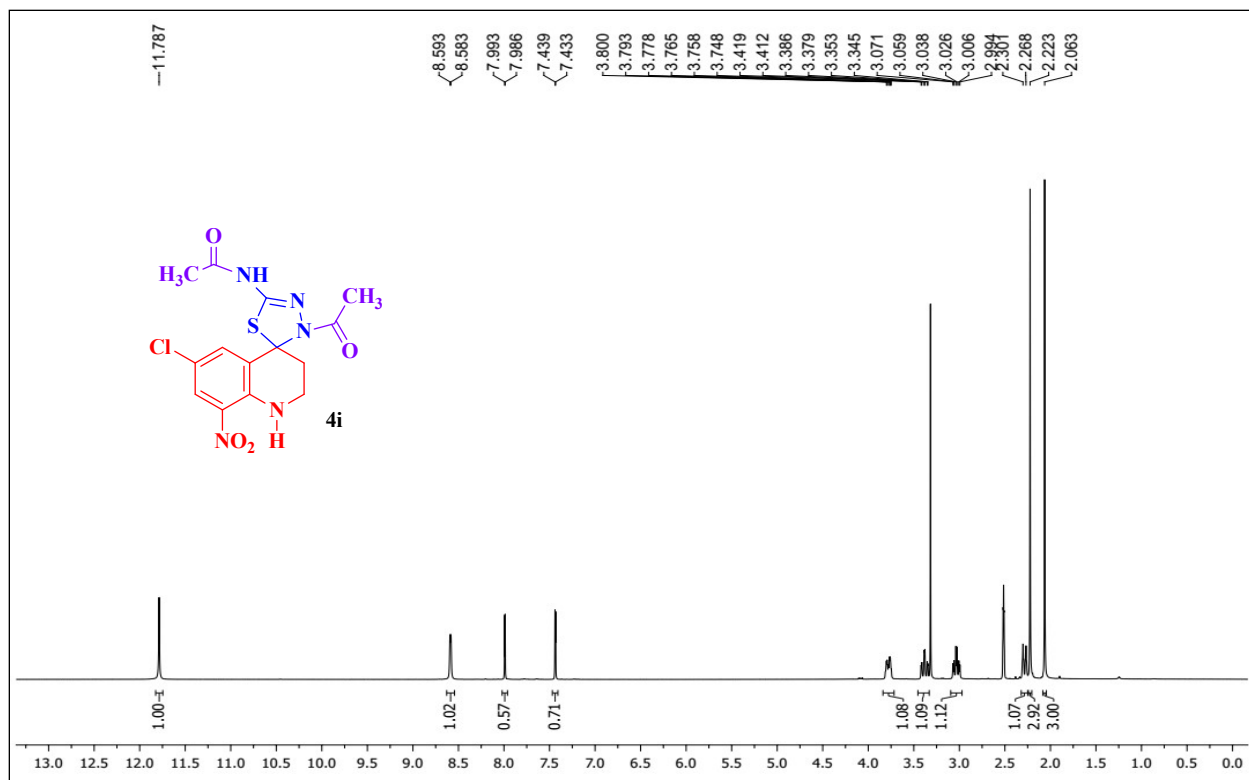

Figure S20.  $^1\text{H}$  NMR spectrum of compound 4i

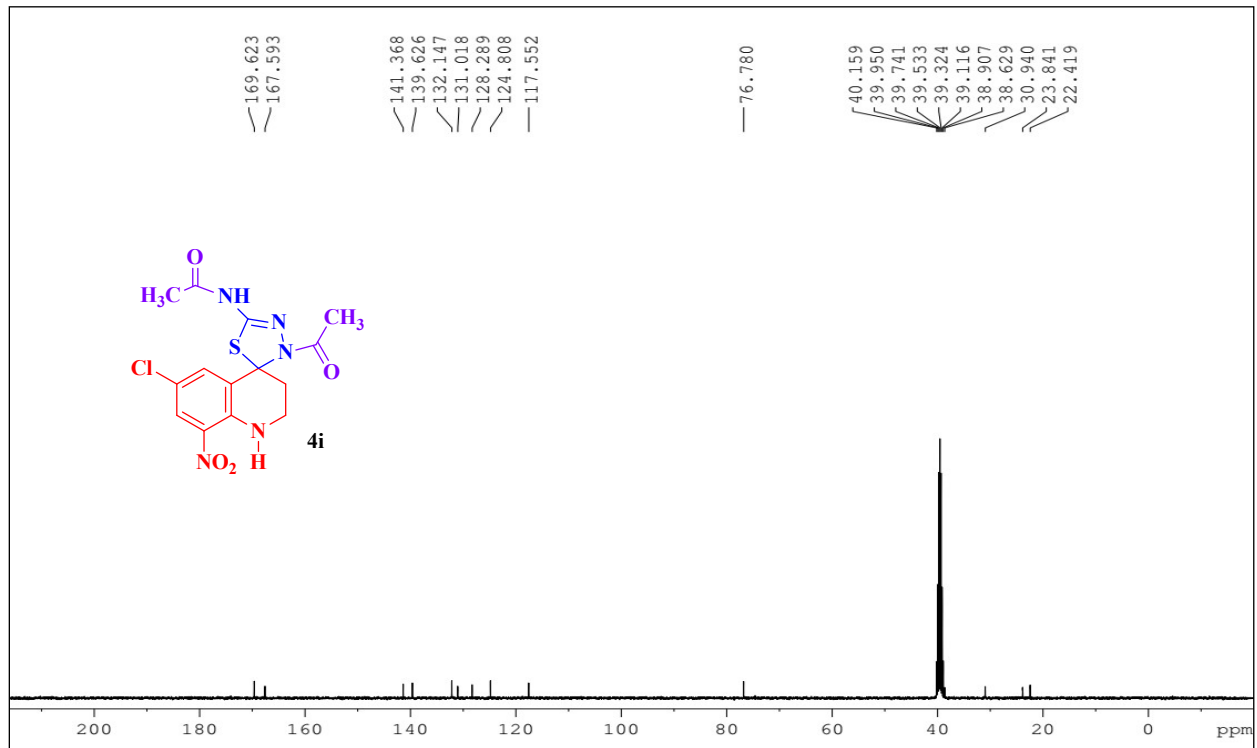

Figure S21.  $^{13}\text{C}$  NMR spectrum of compound 4i

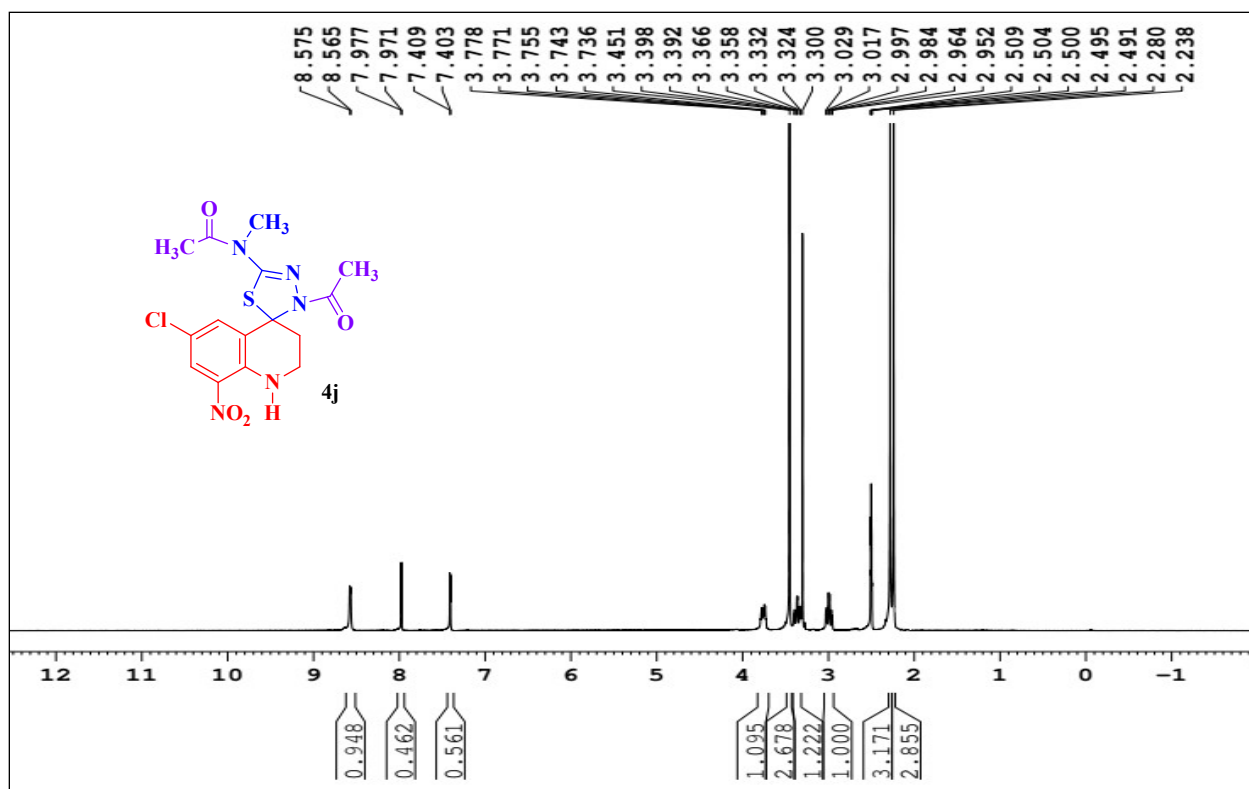

Figure S22. <sup>1</sup>H NMR spectrum of compound 4j

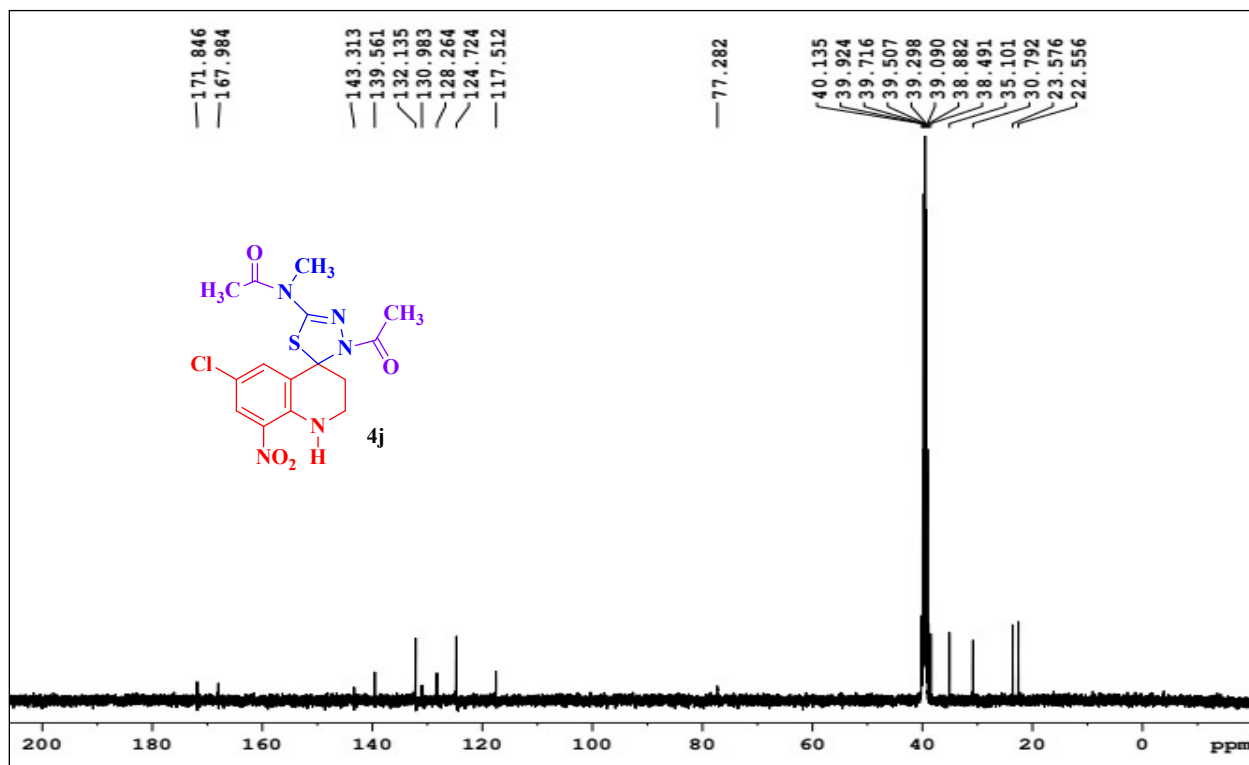

Figure S23. <sup>13</sup>C NMR spectrum of compound 4j

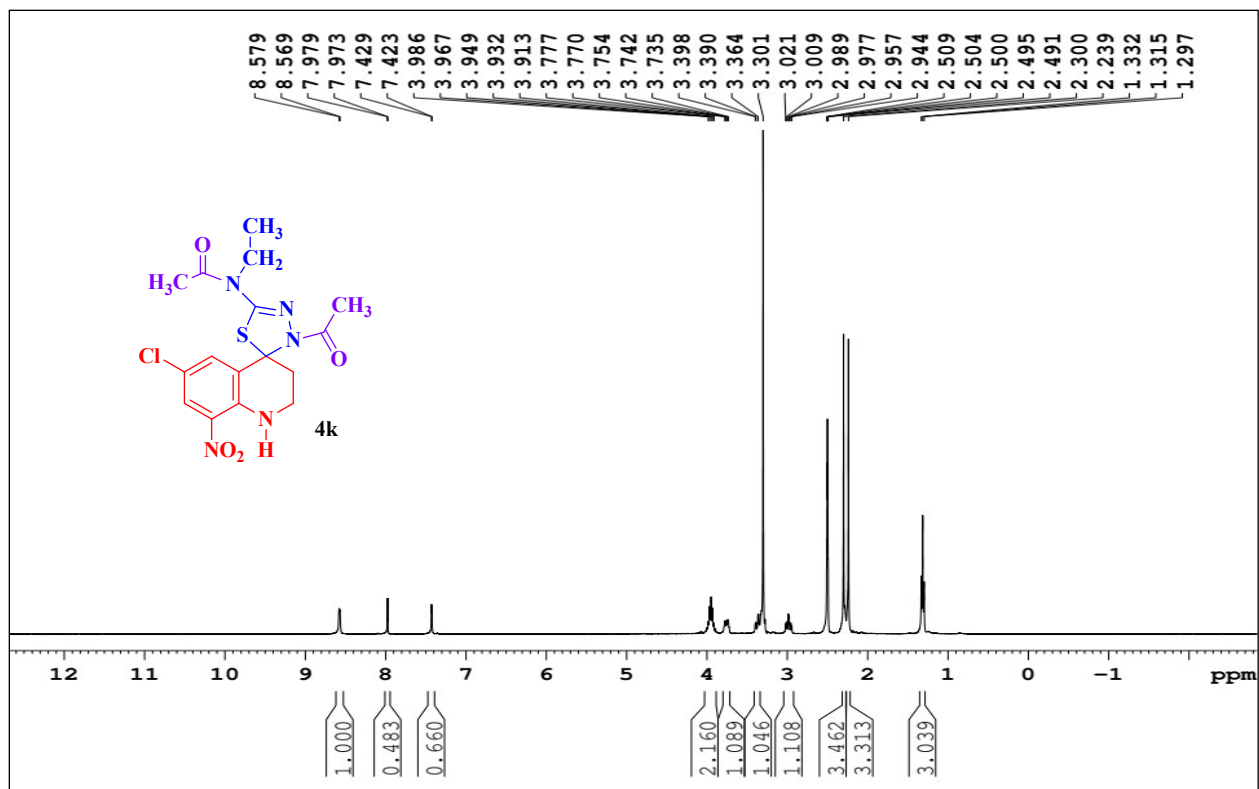

Figure S24. <sup>1</sup>H NMR spectrum of compound 4k

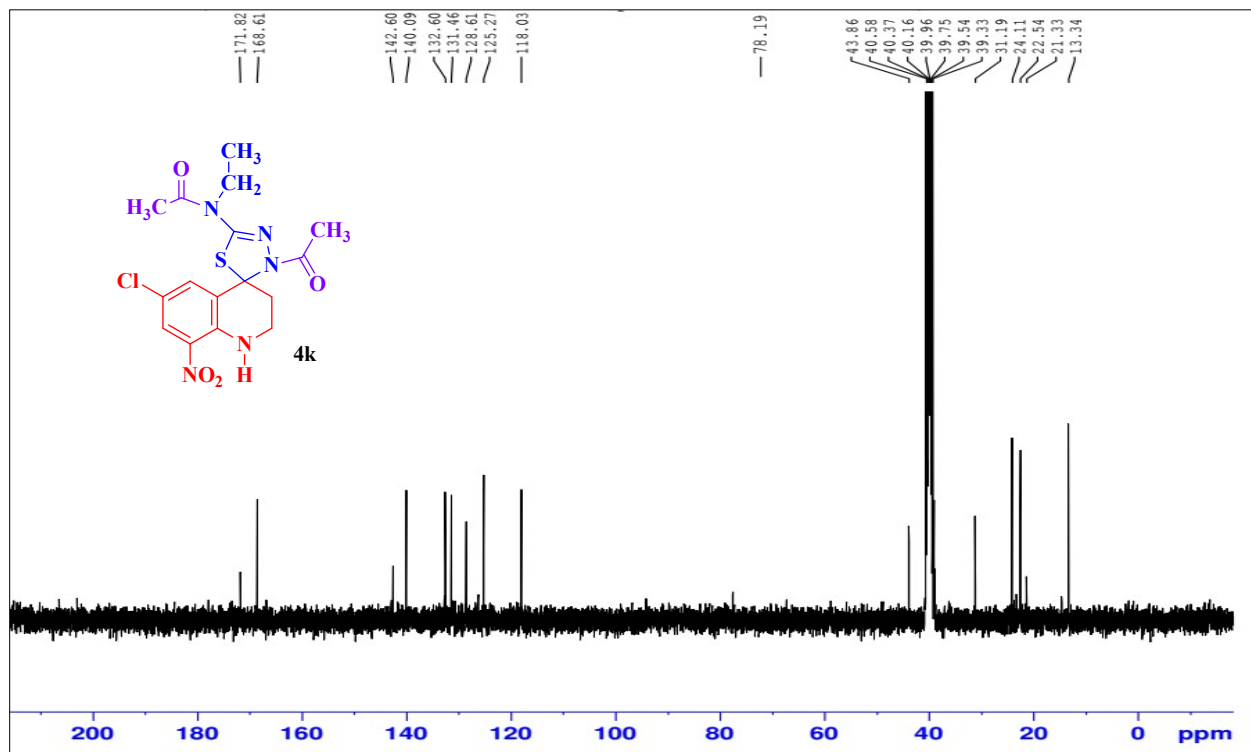

Figure S25. <sup>13</sup>C NMR spectrum of compound 4k



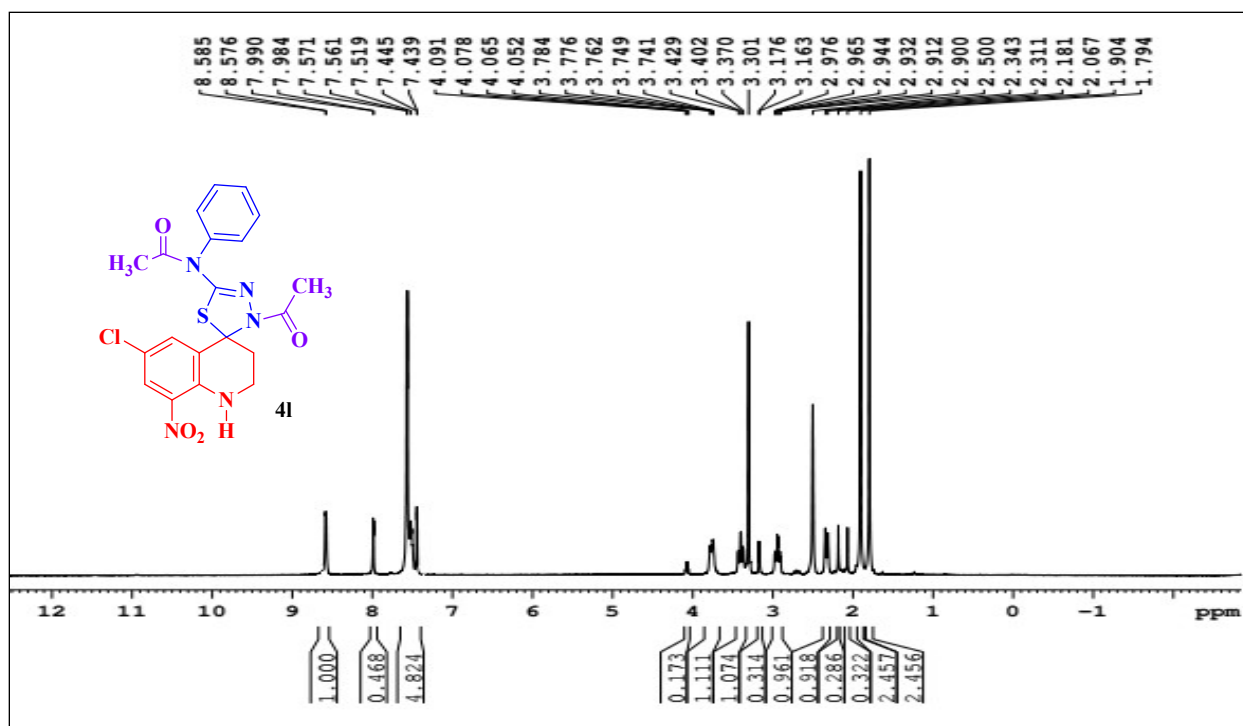

Figure S26.  $^1\text{H}$  NMR spectrum of compound 4l

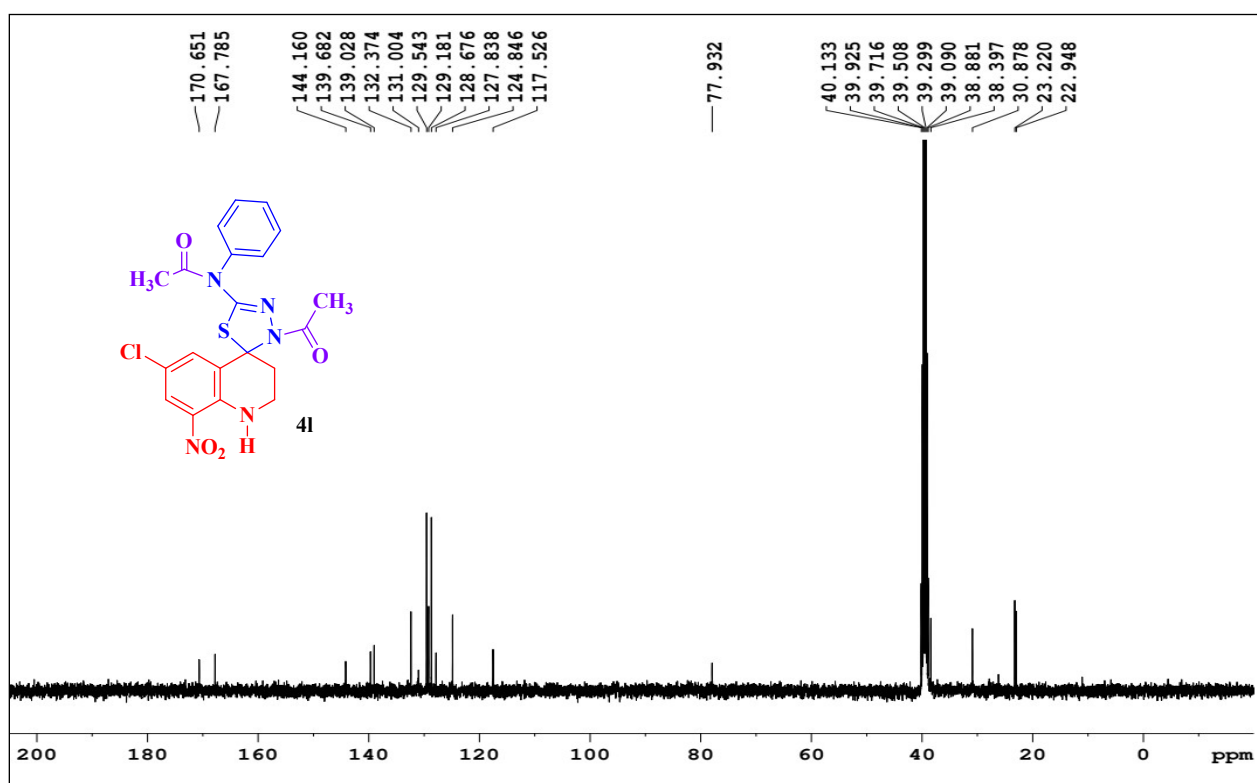

Figure S27.  $^{13}\text{C}$  NMR spectrum of compound 4l
